# Supplementary material
Source: MDPI journal article supplement (https://www.mdpi.com/2072-4292/15/7/1816)
Supplement: s1 [file s1]

Supplementary materials are listed as follows to support the main text:

**Table S1.** The Landsat images for accuracy assessment

| Landsat PathRow | Date                 | Name  |
|-----------------|----------------------|-------|
| 123039          | 1990.12.07(Landsat5) | Time1 |
|                 | 2000.02.26(Landsat7) | Time2 |
|                 | 2020.08.03(Landsat8) | Time3 |
| 125039          | 1990.12.05(Landsat5) | Time4 |
|                 | 2000.11.06(Landsat7) | Time5 |
|                 | 2020.09.18(Landsat8) | Time6 |
| 121037          | 1990.04.13(Landsat5) | Time7 |
|                 | 2000.04.16(Landsat7) | Time8 |
|                 | 2020.04.15(Landsat8) | Time9 |

**Table S2.** Accuracy of water body extraction under different water body indices in different study backgrounds

| Sensor Tiles                          |     | NDWI  | MNDWI  | MBWI  | USI   | Rule1 | Rule2  | Rule3 | Rule4  | Rule4-GAIA |
|---------------------------------------|-----|-------|--------|-------|-------|-------|--------|-------|--------|------------|
| City:<br>Landsat-8-SR-123039-20200803 | OA  | 91.00 | 94.00  | 89.50 | 91.00 | 70.50 | 78.50  | 89.50 | 93.00  | 98.50      |
|                                       | kap | 76.62 | 85.19  | 67.94 | 75.68 | 31.79 | 55.44  | 71.81 | 82.93  | 96.08      |
|                                       | PA  | 86.00 | 100.00 | 60.00 | 80.00 | 64.00 | 100.00 | 78.00 | 100.00 | 100.00     |

|                                                       |           |            |            |           |            |           |            |            |            |           |
|-------------------------------------------------------|-----------|------------|------------|-----------|------------|-----------|------------|------------|------------|-----------|
| City:<br>Landsat-7-<br>SR-123039-<br>20000226         | UA        | 79.6<br>3  | 80.65      | 96.7<br>7 | 83.3<br>3  | 43.<br>84 | 53.7<br>6  | 79.5<br>9  | 78.1<br>3  | 94.3<br>4 |
|                                                       | OA        | 88.0<br>0  | 84.40      | 90.5<br>0 | 78.9<br>5  | 72.<br>25 | 85.6<br>5  | 78.4<br>7  | 90.4<br>3  | 96.1<br>7 |
|                                                       | kap<br>pa | 70.0<br>5  | 67.87      | 71.4<br>3 | 32.8<br>6  | 30.<br>08 | 69.0<br>3  | 42.4<br>2  | 78.3<br>8  | 90.8<br>4 |
|                                                       | PA        | 66.2<br>5  | 97.50      | 64.0<br>0 | 25.4<br>2  | 47.<br>46 | 98.3<br>1  | 49.1<br>5  | 98.3<br>1  | 98.3<br>1 |
| City:<br>Landsat-5-<br>SR-123039-<br>19901207         | UA        | 94.6<br>4  | 67.83      | 96.9<br>7 | 100.<br>00 | 50.<br>91 | 66.6<br>7  | 65.9<br>1  | 75.3<br>2  | 89.2<br>3 |
|                                                       | OA        | 81.7<br>2  | 78.62      | 82.0<br>0 | 83.1<br>0  | 70.<br>00 | 78.2<br>8  | 76.9<br>0  | 87.2<br>4  | 91.3<br>8 |
|                                                       | kap<br>pa | 55.8<br>2  | 55.97      | 53.2<br>5 | 54.5<br>6  | 27.<br>02 | 55.1<br>4  | 48.3<br>9  | 71.6<br>7  | 80.1<br>6 |
|                                                       | PA        | 64.4<br>4  | 90.00      | 68.0<br>0 | 48.8<br>9  | 44.<br>44 | 88.8<br>9  | 71.1<br>1  | 88.8<br>9  | 88.8<br>9 |
| Mountain:<br>Landsat-8-<br>SR-125039-<br>20200918     | UA        | 73.4<br>2  | 60.45      | 62.9<br>6 | 93.6<br>2  | 51.<br>95 | 60.1<br>5  | 60.9<br>5  | 74.7<br>7  | 84.2<br>1 |
|                                                       | OA        | 97.9<br>2  | 94.58      | 79.5<br>8 | 95.4<br>2  | 79.<br>17 | 82.9<br>2  | 82.9<br>2  | 98.7<br>5  |           |
|                                                       | kap<br>pa | 94.2<br>9  | 86.10      | 52.6<br>6 | 86.9<br>8  | 51.<br>46 | 61.8<br>6  | 61.8<br>6  | 96.6<br>1  |           |
|                                                       | PA        | 91.6<br>7  | 95.00      | 81.6<br>7 | 81.6<br>7  | 80.<br>00 | 95.0<br>0  | 95.0<br>0  | 95.0<br>0  |           |
| Mountain:<br>Landsat-7-<br>SR-<br>125039_200<br>01106 | UA        | 100.<br>00 | 85.07      | 56.3<br>2 | 100.<br>00 | 55.<br>81 | 60.0<br>0  | 60.0<br>0  | 100.<br>00 |           |
|                                                       | OA        | 97.0<br>0  | 72.00      | 68.5<br>0 | 95.0<br>0  | 61.<br>50 | 65.5<br>0  | 66.0<br>0  | 97.5<br>0  |           |
|                                                       | kap<br>pa | 91.6<br>7  | 45.63      | 39.7<br>1 | 87.0<br>1  | 26.<br>32 | 36.9<br>9  | 37.6<br>1  | 93.5<br>5  |           |
|                                                       | PA        | 88.0<br>0  | 100.0<br>0 | 96.0<br>0 | 94.0<br>0  | 82.<br>00 | 100.<br>00 | 100.<br>00 | 100.<br>00 |           |
|                                                       | UA        | 100.<br>00 | 47.17      | 44.0<br>4 | 87.0<br>4  | 37.<br>61 | 42.0<br>2  | 42.3<br>7  | 90.9<br>1  |           |

|                                                    |           |           |            |            |           |           |            |           |           |
|----------------------------------------------------|-----------|-----------|------------|------------|-----------|-----------|------------|-----------|-----------|
| Mountain:<br>Landsat-5-<br>SR- 123039-<br>19901207 | OA        | 87.6<br>2 | 64.50      | 62.3<br>8  | 83.8<br>1 | 58.<br>00 | 64.0<br>0  | 64.0<br>0 | 87.5<br>0 |
|                                                    | kap<br>pa | 66.6<br>7 | 34.56      | 31.4<br>7  | 54.9<br>2 | 15.<br>15 | 33.9<br>4  | 33.3<br>3 | 70.4<br>1 |
|                                                    | PA        | 63.3<br>3 | 96.00      | 91.6<br>7  | 51.6<br>7 | 64.<br>00 | 96.0<br>0  | 94.0<br>0 | 94.0<br>0 |
|                                                    | UA        | 90.4<br>8 | 41.03      | 42.6<br>4  | 86.1<br>1 | 32.<br>65 | 40.6<br>8  | 40.5<br>2 | 68.1<br>2 |
| Field:<br>Landsat-8-<br>SR- 121037-<br>20200415    | OA        | 93.6<br>0 | 80.00      | 91.2<br>0  | 94.4<br>0 | 88.<br>40 | 76.4<br>0  | 75.6<br>0 | 98.4<br>0 |
|                                                    | kap<br>pa | 78.0<br>2 | 54.55      | 76.3<br>9  | 81.0<br>8 | 55.<br>38 | 48.8<br>7  | 46.5<br>8 | 95.0<br>0 |
|                                                    | PA        | 72.0<br>0 | 100.0<br>0 | 100.<br>00 | 76.0<br>0 | 46.<br>00 | 100.<br>00 | 96.0<br>0 | 96.0<br>0 |
|                                                    | UA        | 94.7<br>4 | 50.00      | 69.4<br>4  | 95.0<br>0 | 92.<br>00 | 45.8<br>7  | 44.8<br>6 | 96.0<br>0 |
| Field:<br>Landsat-7-<br>SR-121037-<br>20000416     | OA        | 84.0<br>7 | 78.52      | 84.4<br>4  | 80.3<br>7 | 90.<br>37 | 81.8<br>5  | 81.1<br>1 | 94.4<br>4 |
|                                                    | kap<br>pa | 49.9<br>4 | 55.61      | 63.5<br>6  | 34.6<br>3 | 72.<br>64 | 59.6<br>8  | 57.7<br>0 | 85.3<br>3 |
|                                                    | PA        | 42.8<br>6 | 98.57      | 87.1<br>4  | 28.5<br>7 | 68.<br>57 | 91.4<br>3  | 88.5<br>7 | 87.1<br>4 |
|                                                    | UA        | 90.9<br>1 | 54.76      | 64.8<br>9  | 86.9<br>6 | 92.<br>31 | 59.8<br>1  | 59.0<br>5 | 91.0<br>4 |
| Field:<br>Landsat-5-<br>SR- 121037-<br>19900413    | OA        | 81.1<br>5 | 84.23      | 91.1<br>5  | 83.8<br>5 | 81.<br>54 | 88.4<br>6  | 82.3<br>1 | 97.3<br>1 |
|                                                    | kap<br>pa | 52.5<br>3 | 68.24      | 81.1<br>9  | 60.1<br>5 | 53.<br>91 | 75.6<br>6  | 61.1<br>2 | 93.9<br>7 |
|                                                    | PA        | 46.6<br>7 | 97.78      | 95.5<br>6  | 54.4<br>4 | 48.<br>89 | 93.3<br>3  | 75.5<br>6 | 93.3<br>3 |
|                                                    | UA        | 97.6<br>7 | 69.29      | 81.9<br>0  | 98.0<br>0 | 95.<br>65 | 77.7<br>8  | 73.9<br>1 | 98.8<br>2 |

---

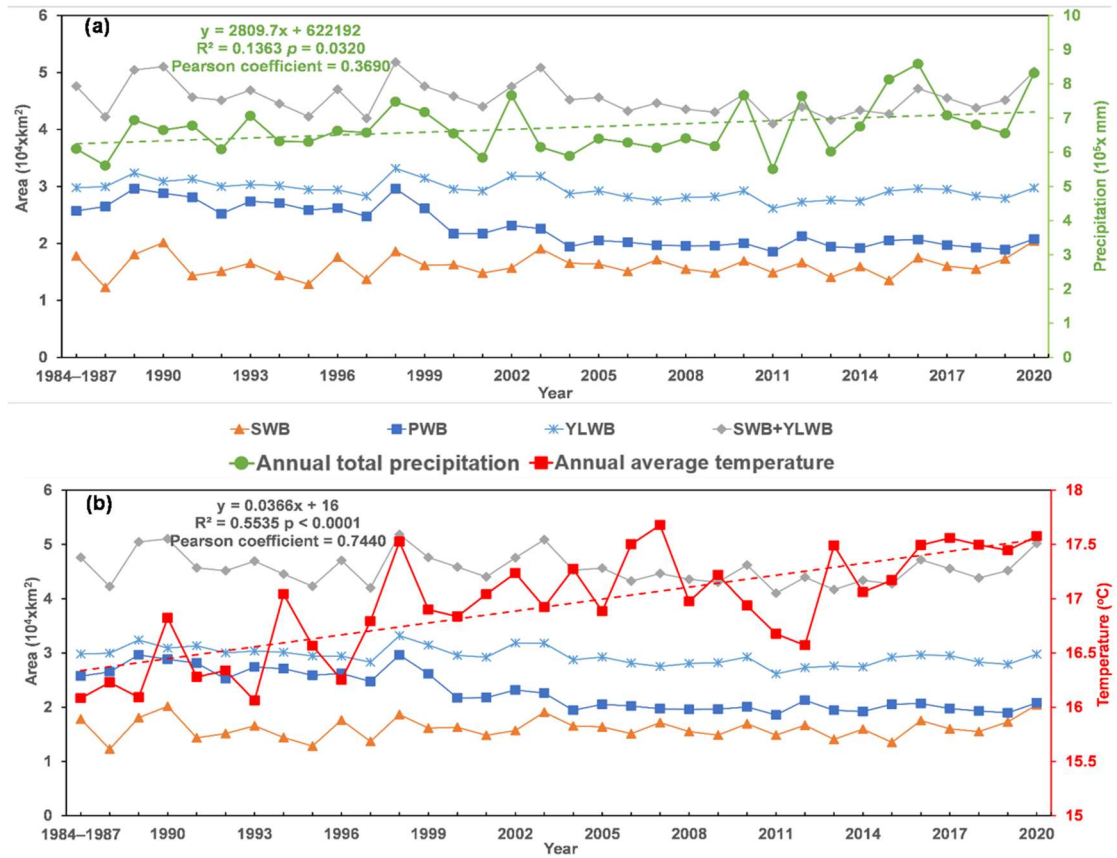

**Figure S1.** Annual variations in (a) the water area and precipitation and (b) the water area and temperature based on the area of each open surface water type from 1984 to 2020 in the MLYP

**Table S3** Pearson correlation coefficients and p-value between the surface water area and precipitation and temperature in the MLYP during 1984–2020.

|                     |               | SWB    | PWB    | YLWB    | SWB+YLWB |
|---------------------|---------------|--------|--------|---------|----------|
| Pearson correlation | Precipitation | 0.3636 | 0.0193 | 0.2970  | 0.4075   |
|                     | Temperature   | 0.1314 | −0.609 | −0.2411 | −0.0458  |
| <i>p</i> -value     | Precipitation | 0.0350 | 0.5380 | 0.0540  | 0.0170   |
|                     | Temperature   | 0.4590 | 0.0001 | 0.1700  | 0.7970   |

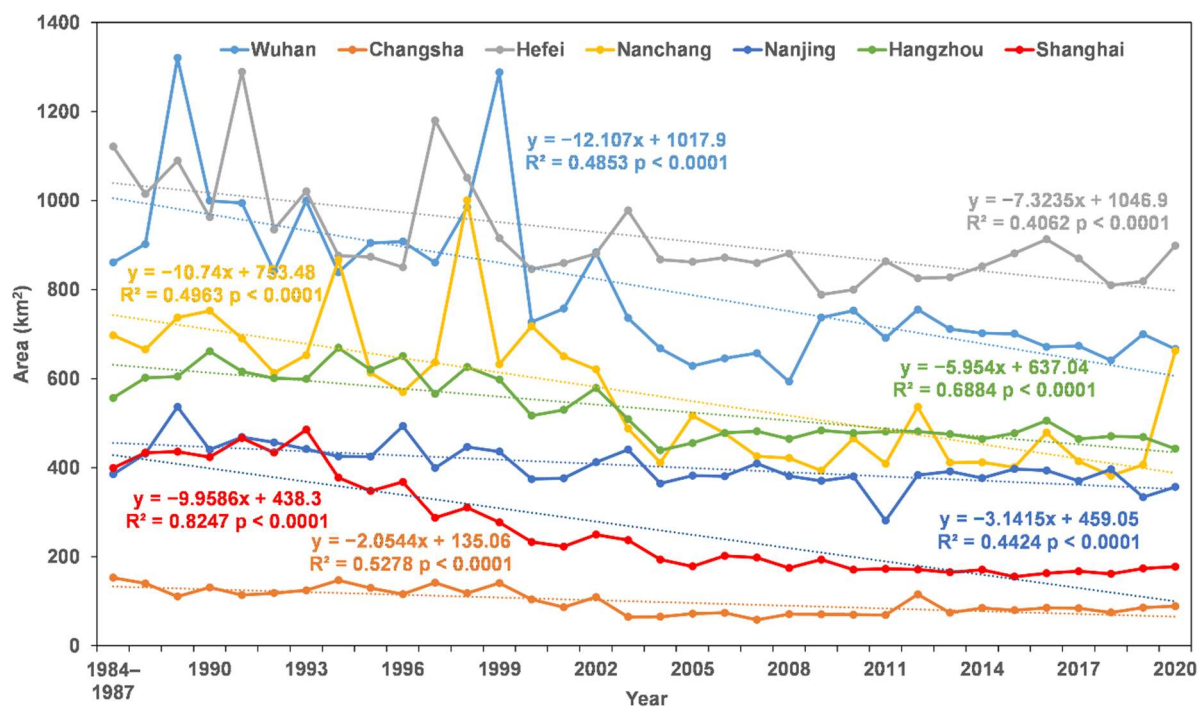

**Figure S2** The temporal variation and linear trend regression of open surface permanent water area for seven provincial capitals in the MLYP.

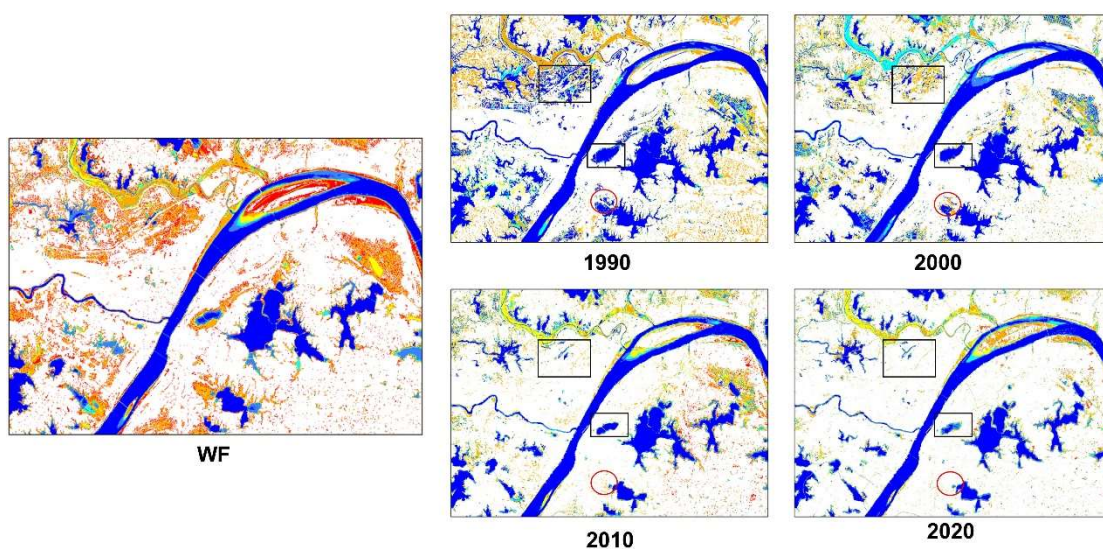

**Figure S3.** The decreases in water bodies due to urban development.

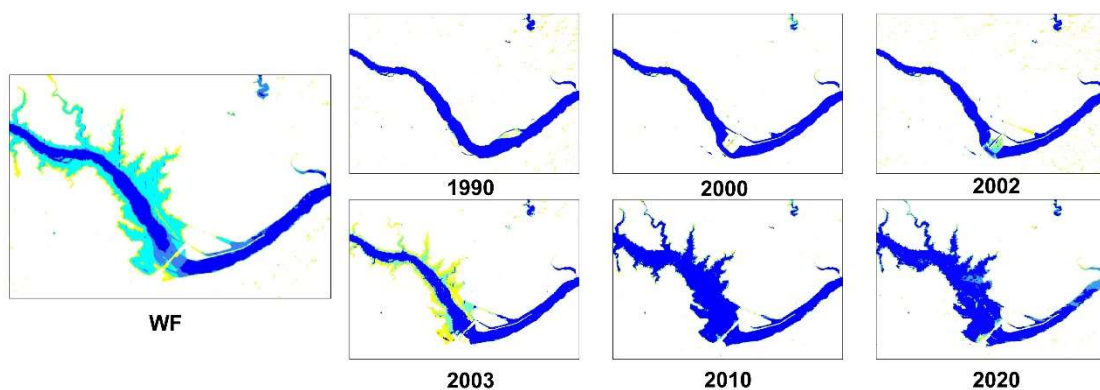

**Figure S4.** The increases in water bodies due to the construction of the Three Gorges Dam hydraulic facility.

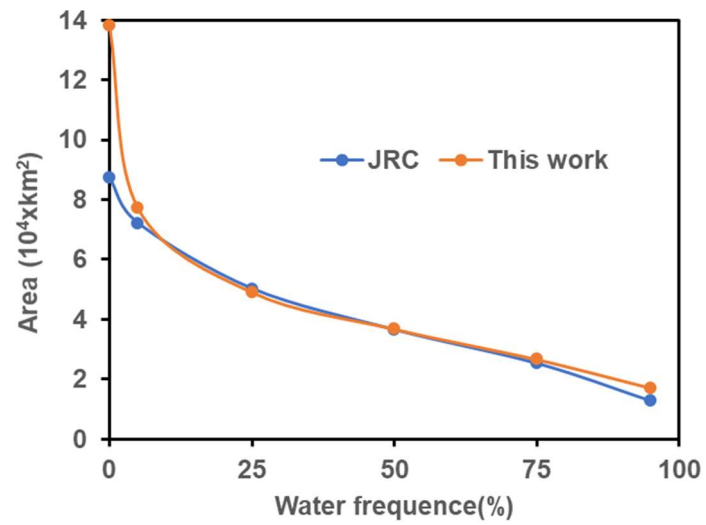

**Figure S5.** Comparing the area of each classified water frequency in JRC and this paper.
